# Supplementary material
Source: publisher figshare collection journal article supplement (https://sage.figshare.com/ndownloader/files/23134109)
Supplement: Supplementary file 1 [file 23134109]

Viejos amigos en nuevos tiempos. Alianzas y rupturas entre partidos progresistas y movimientos sindicales en el cono sur.

Fabricio Carneiro, Guillermo Fuentes, y Carmen Midaglia

Introducción

Los diferentes gobiernos progresistas de la región han sido agrupados por buena parte de la literatura en dos categorías: izquierdas moderadas[[1]](#endnote-2) que generalmente han continuado con las reformas de mercado promovidas durante las décadas anteriores, e izquierdas radicales o populistas, que han buscado desmontar las políticas neoliberales otorgando un mayor rol al Estado. Las izquierdas moderadas agrupan a partidos que llegaron al gobierno en países como Brasil, Chile y Uruguay; mientras que las izquierdas más radicales incluyen a los gobiernos de países como Bolivia, Ecuador, Venezuela, y en algunos casos Argentina.

Sin embrago, un análisis más detenido de las trayectorias a lo largo de su experiencia en el poder, permite observar importantes diferencias a la interna de estas dos categorías analíticas, tanto a nivel económico como social; pero también en su vínculo con sus bases electorales clásicas: los sindicatos. Esta relación de los actores sindicales con los partidos progresistas ha estado ausente en los estudios más influyentes sobre el “giro a la izquierda” en la región.

Este artículo recurre a la teoría de recursos de poder para analizar e interpretar la relación entre partidos políticos y movimientos sindicales en América Latina, en los primeros quince años del siglo XXI.

El movimiento sindical es un agente social clásico, favorable a la redistribución de la riqueza en las sociedades occidentales. Este movimiento tuvo una incidencia significativa en los países europeos durante el siglo XX, fundamentalmente luego de la Segunda Guerra Mundial, bajo un modelo de desarrollo de corte proteccionista. La combinación de democracia política, actores colectivos organizados, partidos políticos de orientación de izquierda (Laboristas o Socialdemócratas), favorables a la redistribución, pero manteniendo el patrón de acumulación capitalista, generó niveles “moderados” de desigualdad socioeconómica y expansión de la protección social a los trabajadores formales y sus dependientes (Esping Andersen, 1993:57; Marshall y Bottomore, 1998: 53).

América Latina no compartió un escenario económico y político similar al de los contextos desarrollados, pese a promover a partir de los años cincuenta un patrón de crecimiento favorable a la intervención del Estado, el Modelo Sustitutivo de Importaciones (ISI), con expresiones diferenciales según país y región. No obstante, la democracia liberal estaba lejos de encontrarse consolidada en el continente. La represión de las demandas populares, entre ellas las sindicales, se constituyó en una estrategia habitual de los gobiernos, ya sea de las sucesivas dictaduras, como en las nuevas “democracias emergentes” de los años ochenta, limitadas o tuteladas por restricciones electorales y el establecimiento de un patrón de desarrollo neoliberal que conspiró contra la organización de los sectores populares (Patroni and Poitras, 2002: 211-214; O'Donnell, 1996: 37-38).

El debilitamiento que sufrió el movimiento sindical bajo este régimen de acumulación global, que priorizó como criterio político de competitividad económica la flexibilidad y desregulación laboral, refuerza la importancia analítica de estudiar este actor popular en un marco político y económico proclive a tramitar algunas de sus demandas. El siglo XXI generó la posibilidad de analizar las relaciones entre el Estado y los actores colectivos, en particular los sindicatos, en un contexto inédito para la región. Al menos en la primera década, donde se constataba crecimiento económico, producto del *boom* de las *commodities,* cierto grado de estabilidad de la democracia liberal, y el arribo al gobierno de fuerzas políticas progresistas[[2]](#endnote-3), tendientes a conservar las formas de producción vigentes, e incorporando dosis de distribución económica a través de políticas laborales, y otras estrictamente sociales de combate a la pobreza (Prevost, Vanden y Campos, 2012: 21).

En América Latina, la relación entre actores populares y el Estado siempre estuvo tensionada entre modalidades de cooptación, representadas en una incorporación conservadora de grupos sociales, hasta otras contrarias, que convergieron en colaboraciones genuinas para satisfacer un conjunto de reclamos (Dangl, 2010: 5; Filgueira, 2013: 24).

Este tipo de vínculo, construido históricamente por pautas políticas contradictorias, se puso de manifiesto en el período actual, en la medida que los gobiernos de izquierda enfrentaron presiones relativas a conservar el respaldo de amplios sectores del electorado, con el apoyo de coaliciones constituidas por diversas opciones ideológicas; y simultáneamente buscaron mantener el apoyo de los movimientos sociales, entre ellos, el sindical (Riethof, 2018: 7).

Privilegiar en este artículo el análisis del sindicalismo, no significa desconocer teórica y empíricamente otras formas de acción colectiva que han tenido relevancia en la región, tanto en el pasado como en el presente (movimiento de los sin tierra; indígenas, feminista, estudiantil, piqueteros, entre otros). Algunas de estas expresiones populares son relativamente nuevas, y en cambio otras se constituyen en base a viejas reivindicaciones por justicia social, que enfrentaron el colonialismo, el neocolonialismo y la resistencia de las élites regionales en reconocerlos en el proceso de modernización que tuvo lugar en la región en el siglo pasado (Prevost, Vanden y Campos, 2012). Este paquete renovado de demandas sociales, tiende a manifiestarse en circunstancias en las que se identifican oportunidades políticas para tramitar sus reclamos, recreando la agenda pública y promoviendo modalidades alternativas de protesta pública (Tarrow, 1997: 147- 148). Los planteos del movimiento sindical, refuerzan a la vez que complejizan, el reportorio de reclamos populares, en la medida que privilegia su pauta de acción en el conflicto capital vs trabajo.

Los vínculos entre partidos progresistas y actores sindicales han sido variables, sobre todo en los países del Cono Sur (Argentina, Brasil, Chile y Uruguay). En este trabajo analizamos las diversas trayectorias de esas interacciones, y argumentamos que las relaciones entre sindicatos y partidos de izquierda en la región durante la denominada *era progresista*,pueden explicarse en base a dos dimensiones analíticas: i) la estrategia electoral seguida por los partidos progresistas, asociada al armado de las coaliciones de gobierno y la búsqueda de apoyos; y ii) la fragmentación del movimiento sindical en el momento en que esos partidos llegaron al gobierno, expresada en la convivencia o no de más de una central de trabajadores. La combinación de ambos factores determinó formatos diferenciales de intermediación de los intereses laborales, los que tuvieron impactos políticos específicos en cada uno de los casos analizados.

La consideración detallada de los vínculos entre partidos progresistas y movimiento sindical permite identificar situaciones donde las políticas públicas neoliberales de las décadas del ochenta y noventa debilitaron al actor sindical, al tiempo que el acceso al poder de partidos progresistas no logró fortalecer a los sindicatos. El caso típico es el del Partido Socialista (Chilean Socialist Party PS) chileno. En cambio en Uruguay, la alianza entre partido (Frente Amplio -Broad Front-–FA-) y central sindical permitió una fuerte oposición en la etapa de reformas pro mercado, mientras que en la etapa en que el Frente Amplio accedió al gobierno, no sólo se reforzó esa relación, sino que la misma fortaleció a la central única de trabajadores. Un tercer tipo de relación se identifica en el caso argentino, donde el debilitamiento del sindicalismo se expresó en la fragmentación del movimiento sindical, pero la llegada del Kirchnerismo al gobierno nacional provocó una nueva reconfiguración del vínculo entre sindicatos y partido, con una clara revitalización del movimiento sindical. Finalmente en el caso de Brasil, el estrecho vínculo del sindicalismo con el Partido dos Trabalhadores (Workers' Party

PT) en particular de la mayor central del país durante los noventa, no logró mantenerse una vez que Lula Da Silva arribó a la presidencia de ese país.

El presente artículo se plantea explicar los diferentes tipos de relación e intercambio entre los actores clásicos favorables a la distribución económica (partidos progresistas y sindicatos) que se consolidaron en los últimos quince años, en un conjunto de países de América del Sur.

El trabajo se organiza de la siguiente manera: en la sección 2, se analizan las diferencias en los vínculos establecidos entre partidos progresistas y centrales sindicales antes y durante el período del giro progresistas en América Latina. En la tercera sección se busca explicar la variación de dicha relación, centrando la atención en la fragmentación sindical y el tipo de estrategia política que siguieron los partidos progresistas para acceder al gobierno. En las últimas dos secciones se analizan los cuatro casos seleccionados, y a continuación se presentan las conclusiones.

2. Trayectorias de vinculación de partidos progresistas y movimiento sindical

Las relaciones entre partidos de izquierda y sindicatos en el Cono Sur han presentado variaciones importantes desde las transiciones a la democracia en esos países. Uno de los períodos de cambio relevantes en este relacionamiento puede ubicarse a finales de la década del ochenta, con el inicio del giro neoliberal en la región. En esta etapa, mientras algunos partidos de izquierda buscaron adaptarse al nuevo consenso ideológico, adoptando paquetes de políticas de reforma estructural contrarios a sus bases programáticas históricas, otros se mantuvieron como opositores a las reformas en alianza con los sindicatos, y lograron moderar, e incluso detener, reformas liberales en algunos sectores estratégicos de políticas públicas.

En el primer grupo de países se identifica lo que la literatura ha denominado “neoliberalismo por sorpresa” (Stokes, 2001). Muchos partidos políticos, tradicionalmente cercanos al movimiento obrero en el período ISI, realizaron un giro radical en sus plataformas programáticas históricas, adoptando paquetes de liberalización económica, flexibilización laboral y privatizaciones, que generaron consecuencias en el largo plazo para los sistemas de partidos, al desalinear la competencia programática en esos países y desdibujar los clivajes ideológicos entre los partidos del sistema (Roberts, 2014)[[3]](#endnote-4). Otra estrategia de adaptación, fue la formación de alianzas electorales con partidos de centro, que tuvo como efecto el debilitamiento de los vínculos de los partidos progresistas con los actores sindicales.

En este primer grupo podemos colocar la trayectoria del Partido Justicialista (Justicialist Party PJ) en Argentina, y en menor medida al Partido Socialista (PS) en Chile. El PJ comenzó a finales de los años ochenta un proceso de cambio organizacional e ideológico profundo, como una forma de adaptarse a un nuevo electorado, diferente de su núcleo tradicional centrado en los trabajadores industriales urbanos, y a un contexto internacional que imponía limitaciones para llevar adelante la plataforma programática tradicional del partido (Levitsky, 2003: 94). Esta transformación del PJ llevó a un alejamiento del partido de su base sindical tradicional, representado en la pérdida de influencia del sindicalismo dentro de las estructuras del PJ, tanto en la orgánica partidaria como en el parlamento. La des-sindicalización del PJ implicó un cambio en la estrategia electoral del partido, transformándose de un partido de base sindical a uno centrado en redes clientelares y de patronazgo (Levitsky, 2003).

En Chile, el PS se fue alejando del movimiento sindical desde finales de la dictadura de Pinochet. El PS, que durante la experiencia de la Unión Popular durante el gobierno de Salvador Allende a principio de los setenta representaba el ala más radical de la coalición de gobierno, cambió diametralmente su plataforma programática durante la transición democrática (Roberts 1998). La experiencia fallida y traumática de la Unión Popular, llevó al PS a una reevaluación crítica de la democracia liberal y de los riesgos de un programa radical de redistribución, sin una política de alianzas entre clases e interpartidaria. Como resultado de este proceso, el PS transitó la mayor parte del período de post-dictadura como principal socio en una coalición de gobierno con la Democracia Cristiana (Christian Democratic DC): la Concertación. La moderación ideológica del PS como integrante de la coalición de gobierno fue alejando al partido del movimiento sindical, transformándolo en un partido profesional-electoral dominado por la elite política y los cuadros técnicos. Esta pauta de acción predominantemente electoral, tuvo como consecuencia un debilitamiento del movimiento sindical, que marginalizó y fragmentó a las organizaciones de trabajadores, al mismo tiempo que subordinó sus demandas a los dictados del modelo económico y el empresariado (Barrett, 2001).

En un segundo grupo de países, los partidos de izquierda lograron mantenerse como alternativas a la convergencia ideológica neoliberal que predominaba en la región, aunque se fueron moderando programáticamente a medida que crecían electoralmente, y se transformaban en una alternativa probable de gobierno.

En este grupo podemos identificar la trayectoria del Partido dos Trabalhadores (PT) en Brasil y el Frente Amplio (FA) en Uruguay. El PT presentó desde sus orígenes fuertes vínculos con el movimiento sindical. De hecho, se creó como la herramienta política del llamado “nuevo sindicalismo” (Meneguello, 1989), y logró mantenerse durante toda la década del noventa como un partido de oposición a los sucesivos gobiernos. Durante el período de tránsito y consolidación democrática, el PT consiguió conservar su alianza histórica con las fracciones más importantes del sindicalismo brasilero, nucleadas en la *Central Única dos Trabalhadores* (Workers' United Center of Chile, CUT). Si bien el PT no presentó cambios tan radicales en su programa como en el caso del PJ, sí transitó un proceso de moderación ideológica para adaptarse exitosamente a los constreñimientos de las presiones de los mercados internacionales, a medida que su crecimiento electoral lo orientaba hacia el gobierno (Hunter, 2010).

El FA en Uruguay, al igual que el PT, vivió la transición hacia la democracia como una fuerza de oposición a los intentos de reformas liberales promovidos por los partidos tradicionales. Este rol opositor le permitió reforzar su histórica alianza con el movimiento sindical, que caracterizó a esta organización partidaria desde sus orígenes a inicios de la década del setenta. El FA coordinó acciones con el movimiento sindical para activar mecanismos de democracia directa, acciones que fueron en su mayor parte exitosas, y establecieron límites muy fuertes a las agendas de privatizaciones de los diferentes gobiernos del período.

Una segunda etapa de cambios relevantes en el relacionamiento entre organizaciones partidarias y trabajadores organizados puede identificarse con la llegada al gobierno de los distintos partidos de izquierda en la región.

Con el triunfo de Néstor Kirchner en el año 2003, el PJ volvió a reconfigurar sus vínculos con el sindicalismo y con el movimiento piquetero (una organización que agrupa trabajadores informales y desocupados), a partir del otorgamiento de beneficios con la pretensión de reconstituir la histórica alianza entre el PJ y los actores sociales organizados. Entre las medidas a destacar se encuentran: la reactivación de las paritarias (negociación colectiva) con prioridad de la negociación sectorial por rama; el freno y desarticulación de las leyes de flexibilización laboral; el aumento sostenido del salario mínimo; una política de diálogo continuo frente a los conflictos sociales y sindicales; la consolidación del control sindical de las obras sociales; y una política económica expansiva que promovió el empleo y la reindustrialización en algunos sectores (Etchemendy, 2011). Estas medidas le permitieron al gobierno de Kirchner procesar una transformación del PJ en un escenario de fuerte deslegitimación política y crisis del sistema de partidos.

En Chile, en el año 2000 se produjo la llegada al gobierno de un presidente socialista por primera vez después de la experiencia del gobierno de Allende; pero este hecho no significó un cambio radical en el relacionamiento entre el movimiento sindical y el partido. Si bien el PS intentó brindar señales hacia el sindicalismo, aprobando una reforma laboral, la moderación de sus contenidos dividió al partido y dejó desconforme a un movimiento sindical muy débil e incapaz de presionar por cambios más ambiciosos en materia laboral.

En Brasil, el PT logró mantener su alianza con los sindicatos antes de la llegada de Lula Da Silva a la presidencia, pero ese vínculo se fue debilitando a medida que el partido se acercaba la posibilidad del triunfo electoral. Una vez en el gobierno, si bien el PT buscó brindar señales hacia el sindicalismo, por ejemplo con una política de aumento sostenido del salario mínimo, la creación de mecanismos institucionalizados de consulta con las centrales de trabajadores, o la incorporación de líderes sindicales en cargos de gobierno (Cardoso y Gindin 2009), no logró aprobar un proyecto de reforma laboral, siguió políticas macroeconómicas convencionales, y se vio involucrado en numerosos escándalos de corrupción que fueron minando su apoyo dentro del sindicalismo y los movimientos sociales.

En Uruguay, el FA recorrió un camino de moderación ideológica parecido al del PT en Brasil, pero una vez a cargo del gobierno logró mantener su alianza con el movimiento sindical. La reactivación de esquemas de negociación corporativos, junto con la aprobación de numerosas leyes laborales que protegían y expandían los derechos laborales, permitió al partido contar con un movimiento sindical alineado al momento de impulsar reformas, las que en su mayoría no perjudicaban a los trabajadores.

El Cuadro 1 resume las trayectorias de vinculación entre los sindicatos y los partidos progresistas en los dos períodos analizados, antes y después del acceso al gobierno. Como se observa, el patrón de relacionamiento es de continuidad en Chile y Uruguay, y de cambio en Argentina y Brasil.

[cuadro 1 aquí]

En el retorno a la democracia, el PT en Brasil y el FA en Uruguay afianzaron sus alianzas con el sindicalismo, resistiendo a las reformas liberales. En Chile y en Argentina sin embargo, el Partido Socialista y el Partido Justicialista se distanciaron del movimiento sindical, al respetar el statu quo liberal en el primer caso, y promover reformas de orientación al mercado en el segundo caso.

Durante el giro progresista, también se aprecian diferentes trayectorias. Al igual que en la etapa anterior, con la asunción de mayor peso en el gobierno de la Concertación en Chile a partir del 2000, el Partido Socialista se mantuvo distante del movimiento sindical. En contraste, una vez que el PT en Brasil obtuvo el gobierno debilitó su alianza histórica con el movimiento sindical, fundamentalmente a partir de las diferencias que emergieron en relación a la reforma de un pilar de las políticas laborales, como las políticas de retiro o previsionales. El Partido Justicialista en Argentina, que en la etapa anterior se había alejado del sindicalismo, volvió a reconfigurar la alianza una vez a cargo del gobierno.

Finalmente, el FA en Uruguay conservó su estrecha relación, impulsando un paquete de políticas públicas que beneficiaron al sindicalismo, sobre todo con la reactivación de la negociación colectiva por rama de actividad.

Las diferentes relaciones entre partidos y sindicatos configuraron las trayectorias y los cambios en el poder sindical en los diferentes casos. Luego del período de liberalización de los años noventa, los sindicatos en Chile y en Uruguay llegaron relativamente debilitados a la antesala de los gobiernos de orientación de izquierda. Sin embargo, a pesar de ese aspecto en común, en Chile casi no se fortaleció al actor sindical en los años 2000, mientras que en Uruguay se logró una activación del sindicalismo similar a la que el país tenía antes de la liberalización.

[cuadro 2 aquí]

Por otro lado, en Argentina y en Brasil los sindicatos mantuvieron cierta fortaleza relativa durante el proceso de liberalización económica de los noventa, a partir de la preservación de algunos recursos de poder. A pesar de esa similitud, en los 2000 tuvieron diferentes trayectorias de activación: resurgimiento en Argentina y debilitamiento en Brasil.

3. Variables explicativas: estrategia electoral y fragmentación sindical

Como se ha señalado, el triunfo electoral de los partidos progresistas en el sur de América Latina no implicó la construcción de vínculos homogéneos con los movimientos sindicales de cada país. Los matices o diferencias tienen su expresión tanto a nivel de las políticas públicas específicas hacia los trabajadores organizados, como las referidas a relaciones laborales (Carneiro, 2017); como a la construcción de diferentes espacios formalizados de negociación bipartitos o tripartitos. Estos formatos diferenciales de tramitación de intereses pueden explicarse en base a dos variables políticas: la estrategia coalicional del partido, y el grado de fragmentación sindical en el momento en que el partido progresista accede al gobierno.

En relación a la primera variable, aquellos partidos de izquierda que adoptaron una estrategia de búsqueda de coaliciones electorales con fuerzas políticas de orientación ideológica de centro o centro-derecha, en donde los partidos de izquierda no dominaban la coalición, fueron los que más se distanciaron del movimiento sindical. Esta situación de alejamiento se debió a que los partidos de orientación progresista tuvieron dificultades para aprobar reformas que beneficiaban a los sindicatos. En este marco, no se contó con mecanismos para controlar a los socios de la coalición, y un conjunto de políticas pro sindicales fueron bloqueadas, o resultaron moderadas en las negociaciones con los socios de la coalición gobernante.

Por otro lado, la fragmentación organizacional que experimentó el sindicalismo durante el periodo de liberalización determinó sus posibilidades de resurgimiento con la llegada de un partido progresista al gobierno. El mantenimiento del monopolio de la representación de los trabajadores a través de una central unificada, es uno de los recursos de poder más importantes del movimiento sindical por dos razones: primero, porque permite coordinar acciones de protesta y establecer amenazas creíbles de movilización frente a gobiernos y empresarios; segundo, porque otorga al gobierno incentivos a la negociación con el movimiento sindical al contar con un actor unificado capaz de disciplinar y coordinar las acciones de los trabajadores organizados. Por lo tanto, la fragmentación en la representación de los trabajadores es siempre una señal de debilidad de sus organizaciones en la negociación con el gobierno (Murillo 2001, 17). Estas son las dos variables que serán desarrolladas a continuación para cada uno de los casos analizados.

3. 1 La estrategia electoral de los partidos progresistas en el Cono Sur

La estrategia electoral de los partidos gobernantes ha sido una variable fundamental para analizar el vínculo entre izquierda política y sindicatos en Europa. Para esta literatura, la estrategia de los diferentes partidos socialdemócratas para competir electoralmente determina el tipo de alianzas que se pretenden construir y, en consecuencia, la cercanía o alejamiento de los trabajadores organizados. En la medida que los lineamientos prioricen captar al “votante medio”, es esperable que los partidos opten por “liberarse” de compromisos fuertes con los sindicatos.

Planteos como el de Kitschelt (1994) sugieren que los partidos de izquierda asumen posturas más centristas como forma de captar a mayores porciones del electorado. Cuanto más difícil sea la incorporación de nuevos grupos a la interna partidaria, y menos autonomía tengan los líderes de reorientar la estrategia electoral, mayores dificultades tendrán los partidos socialdemócratas de ampliar su caudal electoral.

Además de la estrategia electoral, los vínculos más estrechos entre izquierda y organizaciones laborales han ido debilitándose por la incidencia de otro conjunto de factores, entre los que figuran: los culturales e ideológicos, por el cual los sindicatos han visto cómo sus fronteras ideológicas se difuminan; los denominados estructurales, producto de las transformaciones de la matriz de producción y por ende del mercado de empleo. El declive del empleo industrial, el crecimiento de los trabajadores de cuello blanco y ocupaciones profesionales, han instalado nuevos desafíos para la representación e intermediación política de los intereses laborales. En el caso de América Latina, este proceso venía avanzando desde décadas anteriores, con el agotamiento del modelo ISI. De acuerdo a Weller (1998) la proporción de población económicamente activa empleada en el sector secundario (industria esencialmente), cayó del 25 % al 23,7 % entre 1980 y 1990. Como contrapartida, el empleo en el sector terciario (servicios) pasó del 46,7 % al 53,9 %. Por último, cabe señalar que se han producido cambios en el contexto político y en la pautas de crecimiento, donde las respuestas políticas a las crisis económicas (reestructuras neoliberales) lideradas por gobiernos socialdemócratas, han enfrentado a esos partidos con los sindicatos, y esta tensión fue capitalizada partidos de derecha nacionalista (Hyman & Gumbrell-McCormick, 2010).

Haugsgjerd, Aylott y Christiansen (2010) analizan este vínculo desde una visión netamente instrumental: la relación entre sindicatos y partidos funcionará en tanto ambos actores puedan sacar provecho de la asociación. Para los sindicatos, aliarse a un partido es importante en la medida que el mismo colabore a una mayor afiliación sindical y porque, además, los gobiernos liderados por la socialdemocracia implicarían políticas públicas más cercanas a sus intereses y expectativas. Por el otro lado, para los partidos, la sociedad con los sindicatos puede aportarle financiamiento, pero fundamentalmente votos. Cuando este intercambio se entabla de forma eficiente, es decir con rentabilidad política para los socios, las conexiones permanecen fuertes.

El nuevo escenario económico de los países occidentales ya mencionado, ha debilitado la fuerza de los sindicatos a la hora de asegurar una cantidad significativa de votos. Al mismo tiempo, el deterioro en la imagen de los partidos socialdemócratas, a partir de la gestión de las últimas crisis, alejaron o dificultaron las posibilidades de esas colectividades de transformarse en gobierno, y por lo tanto asegurarse el apoyo irrestricto de los sindicatos (Haugsgjerd, Aylott y Christiansen, 2010).

Un conjunto de partidos de izquierda en América Latina experimentó las tensiones de los partidos socialdemócratas cuando se orientaron a disputar las administraciones nacionales. En los casos analizados en este trabajo, todos los partidos desarrollaron coaliciones electorales y de gobierno para aumentar sus posibilidades de ganar las elecciones y asegurar gobernabilidad.

Sin embargo, las estrategias de coalición definida por esos partidos siguieron trayectorias diferentes: mientras que, en Uruguay, el Frente Amplio se asoció con el Nuevo Espacio (New Space, NE un partido menor de centro izquierda que posteriormente terminó incorporándose al FA); el Frente para la Victoria (Front for Victory, FPV) en Argentina y el Partido dos Trabalhadores (Worker´s Party, PT) en Brasil tuvieron que conformar coaliciones con diversos partidos (en su mayoría de izquierda o centro-izquierda y centro) para lograr mantener mayorías parlamentarias. Finalmente, el Partido Socialista chileno integró desde el fin de la dictadura una coalición integrada por la Democracia Cristiana (DC), el Partido Por la Democracia (Party For Democracy, PPD) y el Partido Radical Socialdemócrata (Social Democrat Radical Party, PRSD) (la Concertación) con una clara orientación de centro al predominar dentro de la coalición la DC. Estas diferentes estrategias de coalición para llegar al gobierno, determinaron las posibilidades de llevar adelante reformas que favorecieran a las bases electorales más clásicas de estos partidos.

[cuadro 3 aquí]

3.2 Fragmentación sindical

La acción colectiva de los grupos sociales subalternos, es decir, aquellos que no disponen de poder estructural propio en las sociedades capitalistas, se transforma en un recurso de poder alternativo, de tipo instrumental, que permite modificar la distribución económica producida por el mercado (Fairfield, 2015). Los sectores socioeconómicos menos privilegiados en el reparto de recursos de poder buscarán mediante la acción colectiva, expresada en partidos y sindicatos, modificar las condiciones y resultados de la distribución de mercado (Korpi, 2006). La teoría de recursos de poder se centra en el vínculo entre partidos de izquierda y sindicatos para explicar resultados de política social.

Los trabajos suelen señalar la importancia de los sindicatos aliados a partidos socialdemócratas en la construcción de Estados de Bienestar universales. La fortaleza de los partidos socialdemócratas asociados a sindicatos poderosos ha mostrado tener un efecto positivo sobre el gasto social del Estado, principalmente en bienes y servicios, y ha estado asociado a mayores consecuencias re-distributivas en comparación con partidos católicos o demócrata-cristianos (Huber, Ragin y Stephens, 1993). La idea básica de esta hipótesis es que las presiones hacia un Estado de Bienestar universal surgen del poder de los actores sociales -sindicatos- y de sus vínculos con partidos políticos afines en la arena electoral. Si bien esta es una teoría extensamente aceptada como explicación del grado de universalismo de las políticas sociales en Europa, no ha sido tenida en cuenta para explicar los cambios recientes en la política social y laboral durante los gobiernos progresistas. La industrialización tardía en América Latina nunca produjo un sector industrial tan extenso e importante como en las democracias industrializadas, lo cual produjo mercados laborales muchos más fragmentados. Además, la movilidad de capital y la presión de los mercados internacionales en la región, limitan la autonomía necesaria que desarrollaron los proyectos socialdemócratas en Europa (Roberts, 2008). Sin embargo, los casos de Uruguay y Argentina muestran que es posible el surgimiento de alianzas entre trabajadores organizados y partidos políticos en estos contextos.

Desde esta perspectiva, la unidad del movimiento obrero aparece como una importante condición a la hora de explicar la capacidad de dicho actor de incidir en la formulación de políticas públicas que garanticen sus derechos.

[Cuadro 4 aquí]

Sin embargo, el proceso de unidad, o por el contrario de fragmentación, del movimiento sindical en América Latina, se desarrolló de manera distinta en los diferentes países. Muchas veces intervinieron los intentos de la clase política de controlar – o directamente cooptar – al movimiento sindical. A lo largo del siglo XX, mientras que el proceso de ISI propició un entorno favorable para el crecimiento y el empoderamiento del accionar sindical, así como para su unificación del movimiento; la adopción regional de un modelo de desarrollo orientado al mercado y los quiebres institucionales de la democracia en la región, trajo consigo un ataque directo a la capacidad de organización y movilización de los sindicatos.

La transición a la democracia que se inició en los casos estudiados desde mediados de los años ochenta, convivió con el cambio de la pauta de crecimiento y acumulación que se orientó hacia el mercado. Estos procesos simultáneos impactaron en el movimiento sindical, tanto en su capacidad de incidir en la toma de decisiones, como en los incentivos para mantener la unidad o la fragmentación del movimiento. A modo de ejemplo, en los cuatro casos analizados, la informalidad (medida por el número de trabajadores que no se encuentran registrados en la seguridad social) creció entre 1990 y el 2000, alcanzando por ejemplo al 45,6 % de trabajadores en Argentina al 2001 (Acuña, Kessler y Repetto, 2002) y el 52,5 % en Brasil (Alejo y Parada, 2017).

Por otra parte, los efectos de las reformas pro mercado no sólo debilitaron la capacidad organizativa del sindicalismo vía precarización del empleo, sino también a partir de la destrucción de puestos de trabajo. También en los cuatro casos puede observarse cómo el desempleo creció durante este período (1990-2000): de 5,9 % a 14,8 % en Argentina; de 4,5 % a 11,4 % en Brasil; de 8,7 % a 10,8 % en Chile; y de 8,9 % a 13,5 % en Uruguay (CEPAL Stat). Los efectos distributivos del cambio del modelo económico profundizaron la debilidad organizativa de las clases trabajadoras, al aumentar las desigualdades de ingreso y dificultando la acción colectiva de los sectores populares (Traversa, 2015). En Argentina, el Índice de Gini entre 1980 y 1998 aumentó de 0.398 a 0.502, en Brasil de 0.574 a 0.592, en Chile de 0.529 a 0.555 y en Uruguay de 0.402 a 0.440 (Bértola y Ocampo 2013: 300). Las reformas pro mercado, contrariamente a las premisas que la sustentaban, evidenciaron que el crecimiento económico por sí mismo no permitió revertir de forma sustentable las situaciones de pobreza y menos aún la desigualdad. En este contexto, la relación entre crecimiento y equidad se volvió un eje clave del debate político en la región (Patroni y Poitras 2002: 211).

Es en este punto que cobra vital importancia el rol de los partidos políticos cercanos a los sindicatos, y la posición de estos actores colectivos en relación a las reformas neoliberales.

En aquellos casos donde los socios partidarios se encontraban en el gobierno, promoviendo reformas que pretendían flexibilizar derechos laborales: el movimiento sindical tendió a fragmentarse entre aquellas centrales que negociaron con el gobierno para conservar ciertos privilegios colectivos, aceptando pérdidas de derechos individuales (posición que tendió a reforzarse donde la amenaza a un retorno autoritario todavía era creíble como en el caso chileno); y otros agrupamientos de las organizaciones laborales que se opusieron a las reformas.

Como contrapartida, en aquellos países donde los partidos de izquierda se encontraban en la oposición durante el período de empuje de las políticas liberales, el movimiento sindical se mantuvo relativamente unido para intentar limitar el alcance de las reformas, construyendo una coalición defensora con los partidos de izquierda, como ocurrió en Uruguay.

4. El vínculo sindicatos-partidos en el Cono Sur.

Argentina

En la Argentina de Carlos Menem se procesaron serias reconversiones en el mercado formal de empleo (precarización de contratos de trabajo, tercerización de actividades, etc.), que tuvieron un fuerte impacto en la unidad del movimiento sindical (Svampa, 2007, Novick, 2001; Etchemendy y Collier, 2008; Murillo, 2013). La histórica central sindical, la Central General de Trabajadores (General Confederation of Labor of the Argentine Republic, CGT) procesó divisiones internas: por un lado, la corriente denominada “oficialista”, que se benefició de las políticas pro-mercado, ya sea asegurando el control sobre los clásicos recursos de las protecciones laborales, como el desarrollo de prácticas empresariales a partir de los sectores económicos privatizados. La línea alternativa dentro de la mencionada central se calificó como “CGT opositora”, que reclamaba cierto nivel de intervencionismo estatal, y generó niveles significativos de presión sindical. Una tercera posición la constituyó la llamada “CGT azul y blanca”, que intentó mantener una posición de distancia con el posterior gobierno Kichnerista.

En 1992 se produce una ruptura de la clásica central, creándose una nueva que pretende independencia de los partidos políticos, denominada Central de los Trabajadores Argentinos (Argentine Workers' Central Union, CTA), integrada esencialmente por sectores de trabajadores estatales (Svampa, 2007). Cabe señalar que los recursos de poder institucional que disponen esas dos organizaciones laborales son desiguales: la CGT posee la habilitación jurídica, y por ende reconocimiento del Estado para representar y manejar las fuentes de financiamiento sindical, mientras que la CTA solamente posee de Inscripción Gremial, limitando así su capacidad de acción.

La llegada al gobierno del Frente Para la Victoria (FPV), coalición liderada por el Kirchnerismo, determinó el inicio de un nuevo período de relacionamiento entre el PJ y el sindicalismo. Entre los gestos políticos que realizó el gobierno de Néstor Kirchner se encuentra la derogación de una ley aprobada durante el gobierno de Fernando De la Rúa, conocida como “ley Banelco” (Nº 25.250), que entre otras cosas precarizó las relaciones laborales, aumentando el período de contratación a prueba, y promoviendo las negociaciones por empresa.

El proceso de derogación significó el estreno de la mayoría propia por parte del FPV en el año 2004, y fue aprobada con 215 votos a favor y solo 23 en contra. La medida tuvo el apoyo, además de la coalición de gobierno, de la Unión Cívica Radical (Radical Civil Union, UCR), el movimiento piquetero; al tiempo que logró el visto bueno del espectro mayoritario del movimiento sindical: la CTA, la CGT “oficial” y la CGT “rebelde” (La Nación 15/12/2003).

Brasil

En el caso de Brasil, el largo proceso de liberalización económica tuvo cierta simultaneidad con la renovación del movimiento sindical (el “nuevo sindicalismo”) de los años ochenta. El resultado de este período, si bien fue la consagración de un patrón fragmentado de acción sindical, fue que las nuevas centrales no sólo expresaron visiones diferenciales del conflicto capital-trabajo, sino que establecieron formatos políticos específicos de tramitación de intereses, generando vínculos con los modernos partidos políticos brasileños. Cabe destacar, que en el período de empuje de las políticas económicas de corte liberal (presidencias de Fernando Collor de Mello y Fernando Henrique Cardoso), el sindicalismo mantuvo una posición defensiva en el intento de conservar las protecciones laborales logradas.

En el amplio universo de centrales sindicales, las cuatro principales en términos de sindicatos afiliados son: la *Central Única dos Trabalhadores* (Unified Workers' Central, CUT), *Força Sindical* (Union Strength, FS), *Nova Central Sindical dos Trabalhadores* (New Central Union of Workers, NCST) y *União Geral dos Trabalhadores* (General Union of Workers, UCT), que muestran estrategias particulares de acción política.

La CUT se transformó en la mayor central sindical de ese país, alcanzando una amplia representación nacional, e incorporando en su seno a los trabajadores rurales y con estrechos vínculos con el PT (Da Silva, 2011). FS se ubica como la segunda organización en importancia, y su propuesta ha sido la generación de un sindicalismo independiente, autónomo de los partidos políticos, y pragmático; con el objetivo de establecer intercambios con el empresariado y el gobierno. Por su parte, la NCST y UCT son centrales creadas en el siglo XXI, en un contexto de reorganización de las unidades representativas de los trabajadores que tuvo lugar en las administraciones de izquierda. Ambas organizaciones laborales supusieron rearticulaciones de confederaciones ya existentes (Radermacher y Melleiro, 2007).

Bajo la presidencia del PT se lograron conquistas importantes en materia laboral, esencialmente en relación a los derechos individuales, como aumentos sustantivos del salario mínimo, que supusieron un incremento del 54% una vez finalizado los dos mandatos del presidente Lula (Cook y Bazler, 2013). Sin embargo, las principales iniciativas sobre trabajo del gobierno consiguieron apenas aprobaciones parciales, y algunas naufragaron en el camino (Radermacher y Melleiro, 2007).

Las dos grandes reformas promovidas, la laboral y la sindical, que requerían de amplios y sólidos consensos políticos en la medida que suponían una seria revisión del sistema de relaciones laborales en temas estratégicos como la organización sindical, la negociación colectiva, o el reconocimiento legal de las centrales sindicales, generaron divisiones en el movimiento sindical y realineamientos políticos en la esfera del congreso nacional.

Si bien se consagró un espacio tripartito de diálogo, el Foro Nacional del Trabajo, para discutir esta agenda reformista, los acuerdos alcanzados fueron objeto de revisiones en las comisiones parlamentarias, en las que los empresarios lograron bloquear algunas de las propuestas originales, y en su lugar surgieron alternativas que se distanciaban del eje de acción del gobierno. Además, interesa señalar que la ley sobre habilitación legal de las centrales aprobada en 2008 agudizó la fragmentación del sindicalismo, promoviendo niveles de competencia política y económica en un marco político y administrativo de baja regulación de la formación de nuevos sindicatos (Cook and. Bazler, 2013).

Los limitados resultados obtenidos en materia de reforma laboral se explican por el tipo de coalición de gobierno que construyó el PT, con fuerzas políticas de centro, como la del Partido del Movimiento Democrático Brasileño (PMDB), y por el significativo nivel de segmentación del movimiento sindical, que se expresa en la existencia de varias centrales sindicales.

La coalición de gobierno se inscribe en un sistema político-institucional consagrado en la Constitución de 1988, que combina un esquema presidencialista con una estructura federal, de tres niveles, asentada 26 estados y 5.561 municipios, denominado “presidencialismo de coalición” (Souza, 2005). En ese sistema institucional, los poderes de la Unión ganaron incidencia en la definición de las principales políticas públicas, al tiempo que las fuerzas políticas de los distintos Estados tienen fuerte presencia en el Congreso Nacional. Para algunos analistas, el diseño federativo tendió a privilegiar los intereses de los diversos Estados, ya que aumenta el poder informal de los gobernadores (Mainwaring, 1999).

En cambio para otros, la normativa constitucional también fortaleció el poder de la Presidencia en la construcción de agenda legislativa, frenando comportamientos individualistas y aumentando la participación del Ejecutivo en el proceso decisorio (Limongi y Figueiredo, 1998). Más allá de estas interpretaciones, no hay lugar a duda que el gobierno electo necesita formar una coalición de apoyo en el Congreso que le asegure la tramitación y aprobación de las principales medidas de su programa (Souza, 2005). De ahí que la orientación política de los integrantes de esa coalición se torna fundamental para tramitar diversas en iniciativas públicas, en este caso las reformas laborales.

Chile

En la dictadura de Augusto Pinochet se aprobó una nueva legislación de trabajo, denominada “Plan Laboral”, que desreguló las relaciones laborales, fomentando un sindicalismo de mercado. Este nuevo esquema legal de vinculación capital-trabajo, si bien reconoció la legalidad de los sindicatos, sólo habilitó sus acciones a nivel de empresa, limitó las huelgas y las negociaciones colectivas, simultáneamente que concedió libertad acción a los empresarios para contratar, sustituir y despedir trabajadores (Gonzalez y Zapata, 2015). En el caso chileno, se restablece en 1988 la Central Unitaria de Trabajadores (Workers' United Center of Chile, CUT), que si bien se reinstala como interlocutor del gobierno y de los empresarios, enmarca su actividad en las reglas del código de trabajo aprobado en el período autoritario. La nueva CUT, ya sea por opción política o circunstancias de contexto, renuncia a la movilización de masas y a la contestación pública, y en consecuencia modera sus demandas (Gutiérrez Crocco, Francisca, 2016).

La posición asumida por la central coincide con la coalición política constituida por el partido Demócrata Cristiano y el Partido Socialista (Concertación) que asumió una posición de control de las demandas sociales, en particular las de distribución económica, bajo el supuesto de asegurar la estabilidad democrática (Drake, 2003). El predominio de la DC en la coalición de gobierno y la influencia del ala demócrata cristiana más liberal, impidió el avance de reformas laborales más ambiciosas que hubieran permitido un mayor alejamiento del legado de mercantización de las relaciones laborales que estableció el Plan Laboral.

En este marco de excesiva moderación política, y sin lograrse cambios sustantivos en las reglas de juego laboral, se inició un proceso de confrontaciones y corrientes de opinión al interior de la CUT, que más adelante derivarán en el quiebre de la histórica unidad sindical.

En el comienzo del siglo XXI, cuando el PS gana posiciones en la coalición de gobierno (presidencia de Ricardo Lagos), la reforma laboral entra en la agenda pública, pero sólo se alcanzan reformulaciones parciales (Gutiérrez Crocco, Francisca, 2016, Frank 2002). Los menguados resultados laborales obtenidos por la acción de la central, y la agudización de los conflictos internos, derivaron en la ruptura de la larga tradición de unidad sindical, creándose dos nuevas centrales: la Central Autónoma de Trabajadores (Autonomus Cebtral of Workers, CAT) y la Unión Nacional de Trabajadores (National Union of Workers, UNT). Resulta evidente que el poder político de la CUT sufrió un nuevo recorte, al que se le sumó el proceso de desafección de los sindicatos de empresa, ya que apenas una proporción minoritaria de esas unidades se encuentra afiliada a esa central de trabajadores (Frías Fernández, Patricio 2008).

Uruguay

El movimiento sindical uruguayo mantuvo su clásica unidad de acción y recuperó su alianza con el partido de izquierda, Frente Amplio, generando estrategias de acción conjunta para frenar, o en su defecto moderar, las políticas económicas liberales. Cabe destacar, que la clásica central sindical - la Convención Nacional de Trabajadores (National Workers Convention, CNT) - recuperó su identidad tradicional suprimida en el período dictatorial, y simultáneamente incorporó las reconversiones procesadas en el tránsito hacia la democracia, que se expresaron en una nueva denominación: “Plenario Intersindical de Trabajadores” (Intersindical Workers' Plenary, PIT). Esta combinación entre tradición y renovación del movimiento sindical uruguayo se plasmó en una nomenclatura alternativa de esa central, que sintetiza su reconfiguración interna y articula en el nombre su pasado y presente: PIT-CNT.

Importa plantear que la ausencia de un Código de Trabajo permitió a los gobiernos democráticos de los años ochenta y de los 2000, reinstalar espacios de negociación colectiva, así como suprimirlos en los años noventa sin necesidad de ajustar la normativa laboral, sólo enfrentando el descontento de los sindicalistas (Senatore, 2009; Carneiro, 2017). En el contexto político, el mantenimiento de las pautas de crecimiento pro-mercado adoptadas, al igual que la mayoría de los países latinoamericanos, estuvieron limitadas, en particular en lo relativo a las privatizaciones de los servicios público y en la disminución del ritmo de las reducciones arancelarias, debido a la acción conjunta de la central sindical (PIT-CNT) y el Frente amplio (Notaro, 2012). El aumento permanente del caudal electoral del FA, que derivó en el triunfo electoral tres elecciones consecutivas en el nuevo siglo, tuvo un impacto positivo en el fortalecimiento de la central sindical (Gonzalez y Zapata, 2015). Con la llegada al gobierno del FA se aprobaron un conjunto de leyes laborales incluida una amplia ley laboral para los trabajadores privados y otra para el sector público que institucionalizó la negociación tripartita en el país.

5. Conclusiones

El análisis de los vínculos entre actores sindicales y partidos progresistas es un tema que ha estado ausente en los análisis comparados sobre el giro a la izquierda en la región. En este trabajo, señalamos la importancia de contar con un movimiento sindical unificado y un partido progresista de domine la coalición de gobierno como condiciones para mantener una alianza entre sindicatos y partidos progresistas en el periodo posterior al auge de las reformas pro mercado.

Mientras que el rol de los sindicatos y su influencia sobre los partidos fue una de las principales perspectivas teóricas para explicar los resultados de las reformas estructurales en los 80' y 90', no ha sido un enfoque importante al momento de evaluar las políticas de los gobiernos progresistas en la región. En este trabajo buscamos subrayar como un enfoque centrado en coaliciones de actores sociales y políticos puede ser útil no sólo para explicar la retracción del Estado de la economía sino también las nuevas formas de intervención del mismo en el periodo posterior al auge a las reformas estructurales.

Finalmente, los nuevos cambios políticos que experimentan la región con la llegada al gobierno de líderes y partidos de derecha, ponen en tensión estos vínculos pero permiten observar la importancia de los diferentes legados de activación del movimiento sindical para hacer frente a los nuevos impulsos neoliberales.

Referencias

Acuña, Carlos; Gabriel Kessler y Fabián Repetto

2002 “Evolución de la política social argentina en la década de los noventa: cambios en su lógica, intencionalidad y en el proceso de hacer la política social” *Proyecto Self-Sustaining Community Development in Comparative Perspective* Acceso 20 de julio, 2018 <http://www1.lanic.utexas.edu/project/etext/llilas/claspo/overviews/argsocpol90s.pdf>

Alejo, Javier y Cecilia Parada

2017 “Desigualdad e informalidad en América Latina: el caso de Brasil” *Desarrollo y Sociedad* 78: 143-199.

Barrett, Patrick S.

2001. “Labour Policy, Labour–Business Relations and the Transition to Democracy in Chile”. *Journal of Latin American Studies* 33 (03): 561-597.

Bértola, Luís y José Antonio Ocampo

2013 *El desarrollo económico de América Latina desde la Independencia*. México: FCE.

Cardoso, Adalberto and Julián Gindin

2009 *Industrial Relations and Collective Bargaining: Argentina, Brazil and Mexico Compared*. Switzerland: ILO.

Cardoso, Adalberto.

2014. “Os sindicatos no Brasil”. *Boletin Mercado de Trabalho* 56 (fev): 21-27.

Carneiro, Fabricio

2017. “Desagregando Reformas: Comparando la Regulación Laboral en las Izquierdas Moderadas.” ms, Universidad Torcuato Di Tella, Buenos Aires.

Cassoni, Adriana, Gastón J. Labadie and Gabriela Fachola.

2005. “The Economic Effect of Unions in Latin America: Their Impact on Wages and Economic Performance of Firms in Uruguay” pp. 101-141 in Peter Kuhn y Gustavo Márquez *What Difference Do Unions Make? Their Impact on Productivity and Wages in Latin America*. Washington: nter-American Development Bank.

Castañeda, Jorge G.

2006. “Latin America’s Left Turn”. *Foreign Affairs* 85 (May/June): 28-43.

Cook, Maria Lorena and Bazler, Joseph C.

2013. “Bringing Unions Back In: Labour and Left Governments in Latin America.” Acceso 12 de octubre 2017 from Cornell University, School of Industrial and Labor Relations site: hp://digitalcommons.ilr.cornell.edu/workingpapers/166/

Da Silva Maria Carolina

2011 "Que ninguém mais ouse duvidar da
capacidade de luta da classe trabalhadora" Anais do XXVI Simpósio Nacional de História – ANPUH-São Paulo. Acceso 24 noviembre, 2017

<http://www.snh2011.anpuh.org/resources/anais/14/1300659271_ARQUIVO_Queninguempersonagenseespectadores.pdf>

Dangl, Benjamin

2010 *Dancing with Dynamite: States and Social Movements in Latin America.* Baltimore: AK Press.

Drake, Paul W.

2003. “El movimiento obrero en Chile de la Unidad Popular a la Concertación” *Revista de Ciencia Política* 23(2): 148-158.

Esping-Andersen, Gosta

1993 *Los Tres Mundos del Estado del Bienestar.* España: Edicions Alfons el Magnanim.

Etchemendy, Sebastián

2011 "El sindicalismo argentino en la era pos-liberal (2003-2011)," pp. 155-166 en Andrés Malamud y Miguel De Luca (ed.) *La política en tiempos de los Kirchner*. Buenos Aires: Eudeba.

Etchemendy, Sebastián and Ruth Berins Collier.

2008 "Golpeados pero de pie: resurgimiento sindical y neocorporativismo segmentado en Argentina (2003-2007)." *Postdata* 13: 145-192.

Fairfield, Tasha

2015 "Structural power in comparative political economy: perspectives from policy formulation in Latin America." *Business and Politics* 17(3): 411-441.

Frank, Volker

2002 “The Elusive Goal in Democratic Chile: Reforming the Pinochet Labor Legislation.” *Latin American Politics and Society* 44 (1): 35-68.

Figueiredo, Argelina Cheibub

2007 "Government coalitions in Brazilian democracy." *Brazilian Political Science Review* 1(2): 182-216.

Filgueira, Fernando

2013 “Los Regímenes de Bienestar en el Ocaso de la Modernización Conservadora: Posibilidades y Límites de la Ciudadanía Social en América Latina”. Revista Uruguaya de Ciencia Política 22 (2): 17-46.

Frías Fernández Patricio

2008. *Los Desafíos del sindicalismo en los inicios del siglo XXI.* Argentina: Ed. CLACSO.

Gonzalez Julio César y Zapata Francisco

2015 “Reformas estructurales y su Impacto en las bases de poder del sindicalismo chileno y uruguayo”. *Trabajo y Sociedad* 24 (verano): 5-32.

Gutiérrez Crocco, Francisca

2016 “¿Sindicatos sin socios, pero representativos? Ideologías de la representatividad sindical en Chile.” *POLIS Revista Latinoamericana* 15 (43): 533-555.

Haugsgjerd, Allern Elin; Nicholas Aylott, and Flemming Juul Christiansen.

2010 “*Scenes from a Marriage: Social democrats and trade unions in Scandinavia*.” Centre for Voting and Parties, University of Copenhagen. Acceso 20 de noviembre, 2017 <http://cvap.polsci.ku.dk/publikationer/arbejdspapirer/working_paper_1/allern_et_al_scenes_from_a_marriage.pdf>

Huber, Evelyne, Charles Ragin, and John D. Stephens

1993 "Social democracy, Christian democracy, constitutional structure, and the welfare state." *American journal of Sociology* 99(3): 711-749.

Hunter, Wendy.

2010 *The Transformation of the Workers' Party in Brazil, 1989–2009*. New York: Cambridge University Press.

Hyman, Richard, and Rebecca Gumbrell-McCormick

2010 “Trade unions, politics and parties: is a new configuration possible?.” *Transfer: European review of labour and research* 16(3): 315-331.

International Labour Office (ILO)

1998 *World Labour Report, 1997-1998: Industrial Relations, Democracy and Social Stability*. Switzerland: ILO.

Kitschelt, Herbert.

1994 *The Transformation of European Social Democracy*. New York: Cambridge University Press.

Korpi, Walter

2006 “Power resources and employer-centered approaches in explanations of welfare states and varieties of capitalism: Protagonists, consenters, and antagonists” *World Politics* 58(2): 167-206.

La Nación

2000 “Estudian otra ley laboral” Acceso 23 octubre, 2017 <http://www.lanacion.com.ar/555625-estudian-otra-ley-laboral>

Lafuente, Ángeles; Aldana Repetto; Wanda Shore y BárbaraTurner

2015 “Coaliciones kirchneristas. Entradas, salidas y desafíos. ¿Unidos y Organizados?.” Ponencia preparada para el *XII Congreso Nacional de Ciencia Política*, organizado por la Sociedad Argentina de Análisis Político y la Universidad Nacional de Cuyo, Mendoza, 12 al 15 de agosto de 2015.

Lanzaro, Jorge

2008. “La Socialdemocracia Criolla.” *Nueva sociedad* 217 (septiembre-octubre):40-58.

Levitsky, Steven, y Kenneth M. Roberts

2011. *The Resurgence of the Latin American Left.* Baltimore: Johns Hopkins University Press.

Levitsky, Steven

2003 *Transforming labor-based parties in Latin America: Argentine Peronism in comparative perspective*. Cambridge: Cambridge University Press.

Limongi, Ferando y Argelina Figueiredo

1998. “Bases institucionais do presidencialismo de coalizão”.*Lua Nova* 44: 81-106.

Lupu, Noam

2014 "Brand dilution and the breakdown of political parties in Latin America." *World Politics* 66(4): 561-602.

Mainwaring, Scott

1999 “Multipartidismo, federalismo robusto y presidencialismo en Brasil.” *Aracauria* *Revista Iberoamericana de Filosofía, Política y* Humanidades 1(2): 58-120.

Marshall, Thomas y Tom Bottomore

1998 *Ciudanía y clase social*. Madrid: Alianza Editorial.

Mazzuchi, Graciela

2009 *Las relaciones laborales en el Uruguay: De 2005 a 2008*. Ginebra: OIT.

Meneguello, Rachel

1989 *PT: a formação de um partido, 1979-1982*. São Paulo: Paz e Terra.

Murillo, María Victoria

2013 “Cambio y continuidad del sindicalismo en democracia. *Revista SAAP*7(2):339-348.

Murillo, María Victoria

2001 *Labor Unions, Partisan Coalitions, and Market Reforms in Latin America*. Cambridge: Cambridge University Press.

Neto, Octavio Amorim

2014 *De Dutra A Lula: La conducción y los determinantes de la política exterior brasileña*. Buenos Aires: EUDEBA.

Notaro, Jorge

2012 “Sindicalismo, reformas estructurales y organización del trabajo. El caso uruguayo, 1985 – 2012” *Revista Gestión de las Personas y Tecnología* 5(4): 64-71.

Novick Marta

2001 "Nuevas reglas de juego en la Argentina, competitividad y actores sindicales" pp.25-46 en Enrique De la Garza A (comp.) *Los sindicatos frente a los procesos de transición política*,. Buenos Aires: CLACSO.

O´Donnell. Guillemro

1996 *El Estado Burocrático Autoritario. Triunfos, derrotas y crisis.* Buenos Aires: Fundación Editorial de Belgrano.

Patroni, Viviana y Manuel Poitras

2002 “Labour in Neoliberal Latin America: An Introduction” *LABOUR, Capital and Society* 35(2): 207-220.

Pereira, Carlos

2010 "Brazil’s executive-legislative relations under the Dilma coalition government." *Washington, Brookings Institution* Acceso 1 de noviembre, 2017

<https://www.brookings.edu/wp-content/uploads/2016/06/1110_brazil_politics_pereira.pdf>

Prevost, Gary; Carlos Oliva Campos y Harry E. Vanden

2012 *Social Movements and Leftist Governments in Latin America.* London: Zed Books.

Radermacher Reiner y Melleiro Waldeli

2007 “El sindicalismo bajo el gobierno de Lula” *Nueva Sociedad* 211:5-18.

Riethof, Marieke

2018 *Labour Mobilization, Politics and Globalization in Brazil: Between Militancy and Moderation.* New York: Palgrave Macmillian.

Roberts, Kenneth M.

2014 *Changing Course in Latin America*. Cambridge: Cambridge University Press.

Roberts, Kenneth M.

2008 “Is social democracy possible in Latin America?” *Nueva Sociedad* 217: 70–86.

Roberts, Kenneth M.

1998 *Deepening democracy?: The Modern Left and Social Movements in Chile and Peru.* Stanford:Stanford University Press.

Senatore, Luís

2009 “Uruguay: 1992-2009: las políticas laborales y el sujeto sindical.” *Revista Latinoamericana de Estudios del Trabajo* 22(2): 53-76.

Souza, Celina

2005 “Federalismo, desenho contitucional e instituições federativas no Brasil pós-1988*Revista de Sociologia e Política* 24(jun):105-121.

Stepan, Alfred

2000 “Brazil’s Decentralized Federalism : Bringing Government Closer to the Citizens?” *Daedalus* 129(2): 145-169.

Stokes, Susan C.

2001 *Mandates and Democracy: Neoliberalism by Surprise in Latin America*. Cambridge: Cambridge University Press.

Svampa, Maristella

2007 “Los Avatares del sindicalismo argentino” *Le Monde Diplomatique*, 7(enero) con el título *Profunda rupturas de las Lealtades.*

Tarrow, Sydney

1997 *El poder en movimiento.* Los movimientos sociales, la acción colectiva y la política . Madrid: Alianza Editorial.

Traversa, Federico

2015 “Inequality, Collective Action and Redistribution: a New Indicator for Assessing a Complex Relationship”. *Revista Española de Investigaciones Sociológicas* 151:167-182.

Webber, Jeffery y Barry Carr

2013 *The New Latin American Left: Cracks in the Empire. Lanham: Roman & Littlefield.*

Weller, Jürgen

1998 “Los mercados laborales en América Latina: su evolución en el largo plazo y sus tendencias recientes”. *CEPAL, Serie Reformas Económicas* Acceso 15 de junio, 2018 <http://archivo.cepal.org/pdfs/1998/S9800094.pdf>

Weyland, Kurt

2011 “The Left: Destroyer or Savior of the Market Model?,” pp. 71-92 in Steven Levitsky and Kenneth Roberts (eds) *The Resurgence of the Latin American Left.* Baltimore: The John Hopkins University Press.

1. Esa categoría ha sido denominada de diferentes formas “moderna” (Castañeda 2006), “socialdemócrata” (Lanzaro 2008), “social-liberal” (Levitsky y Roberts 2011) o “moderada” (Weyland 2011). [↑](#endnote-ref-2)
2. Definimos partidos progresistas a aquellas organizaciones partidarias que tienen en su agenda de gobierno una preocupación por la redistribución de ingresos pero que no buscan implementar modelos económicos alternativos al capitalismo. Estos gobiernos son lo que los estudios desde perspectivas teóricas más radicales han definido como izquierda permitida (Webber y Carr, 2013). [↑](#endnote-ref-3)
3. Cuando este desdibujamiento y pérdida marca en la identidad partidaria se combinó con una fuerte crisis económica o un pobre desempeño en el gobierno la consecuencia fue una crisis partidaria (Lupu 2014).

   Cuadro 1

   DistanciamientoArgentina

   (Partido Justicialista, PJ)Chile (Partido Socialista, PS)

   Fuente: elaboración propia.

   Cuadro 2. Densidad sindical en los países seleccionados (1985-2010)

   PaísesDensidad sindical aDiferencia1985-19901995-20002005-2010Argentina b48,725,440,3+14,9Brasil c21,920,620,3-0,3Chile d13,411,411,6+0,2Uruguay e22,914,721,7+7

   Fuente: elaboración propia. Los datos no son comparables entre países. La densidad de Argentina excluye al sector público y a la agricultura y se expresa en el total de ocupados. Los datos de Brasil representan la densidad sindical en relación a la población asalariada adulta mayor de 18 años. Los datos de Chile y Uruguay muestran la densidad sobre el total de ocupados. b. Datos para los años 1986 y 1995 en base a *World Labour Report* 1997-1998 y el año 2008 con base en ILO, *Country Proﬁles*. c. Datos extraídos de Cardoso (2014). d. Compendio Estadístico de la Dirección de Trabajo. e. Los datos para el período 1985-1997 provienen de Cassoni, Labadie y Fachola (2005) y los de 2008 de Mazzuchi (2009).

   Cuadro 3. Estrategias coalicionales de los partidos de izquierda

   PartidoPeríodoSocios de la coaliciónPredominio del partido en la coaliciónFPV2003-2007ARI (se aleja en 2005), Conservador Popular, de la victoria, nuevo encuentro, Frente Grande (entra en 2005), Partido Justicialista.SíFPV2007-2011Conservador Popular, de la victoria, Frente Grande, Partido Justicialista, Partido Solidario, Partido Demócrata Cristiano (se aleja en 2009), Movimientos Libres del Sur (se aleja en 2009), Intransigente, Forja.SíPT2003-2006Partido Popular Socialista, Partido Socialista Brasileño, Partido Democrático Laborista, Partido Comunista, Partido Socialista, Partido Liberal, Partido de la Movilización Nacional, el Partido Verde.NoPT2006-2010Partido Progresista (PP), Partido Laborista Brasileño (PTB), Partido Verde (PV), Partido Democrata Laborista (PDT), Partido Socialista Brasileño (PSB), Partido Comunista de Brasil (PCdoB), Partido del Movimiento Democrático Brasileño (PMDB),NoPT2010-2014Partido Republicano Brasileño (PRB), Partido Democrático Laborista (PDT), Partido del Movimiento Democrático Brasileño (PMDB), Partido Laborista Nacional (PTN), Partido Social Cristiano (PSC), Partido de la Republica (PR/PL), Partido Laborista Cristiano (PTC), Partido Socialista Brasileño (PSB) y Partido Comunista de Brasil (PCdoB).NoFA2005-2009Nuevo EspacioSíFA2010-2014NingunoSíPS2000-2006Partido Demócrata Cristiano, Partido Por la Democracia, Partido Liberal, Partido Radical SocialdemócrataNoPS2006-2010Partido Demócrata Cristiano, Partido Por la Democracia, Partido Radical SocialdemócrataNoFuente: Elaboración propia en base a Pereira 2010, Cheibub Figueiredo 2007, Amorin Neto 2014, Lafuente, Repetto, Shore y Turner 2015.

   Cuadro 4. Principales centrales sindicales en el Cono Sur

   CentralFecha de creaciónOrigenChileCentral Unitaria de Trabajadores (CUT)1988Congreso de Trabajadores ChilenosUnión Nacional de Trabajadores (UNT)2004Escisión de la CUTCentral Autónoma de Trabajadores (CAT)1995Heredera del sindicalismo cristiano de los 60ArgentinaConfederación General del Trabajo (CGT)1930 (1946 obtiene personería gremial)Unión de sindicatosCentral de Trabajadores de la Argentina (CTA)1992Escisión de la CGTBrasilCentral Única dos Trabalhadores

   (CUT)1983Congreso de la Clase TrabajadoraForça Sindical

   (FS)1992Congreso no Memorial da América Latina Escisión de la Central Geral dos Trabalhadores (CGT)Nova Central Sindical dos Trabalhadores

   (NSTC)2005Unión de confederaciones oficiales reunidas en el 2004 en el Forum Sindical de Trabalhadores (FST)Central dos Trabalhadores e Trabalhadores do Brasil

   (CTB)2007Congreso Nacional de la Clase Trabajadora de Brasil. Escindida de la CUTUnião Geral dos Trabalhadores

   (UGT)2007Congreso Nacional de Trabajadores. Unión de tres Centrales: CGT, Central Autônoma dos Trabalhadores

   (CAT), Social Democracia Sindical (SDS)Central dos Sindicatos Brasileiros

   (CSB)2008Central ‘Getulista’. Surge con el nombre de Central Sindical de Profissionais y en 2012 se cambia a Central dos Sindicatos BrasileirosUruguayPIT-CNT (Plenario Intersindical de Trabajadores- Convención Nacional de Trabjadores)1966 (CNT) y 1983 (PIT)Congreso del Pueblo y acto del 1 de mayo de 1983.

   Fuente: elaboración propia en base a páginas web de las centrales. [↑](#endnote-ref-4)
